# Supplementary material
Source: PubMed Central journal article supplement (PMC3571337)
Supplement: MCB.00990-12_zmb999109857so1.pdf [file MCB.00990-12_zmb999109857so1.pdf]

## SUPPLEMENTAL MATERIAL

### Supplemental Materials and Methods

**Vector construction, protein purification and analysis.** Oligonucleotides and primers used to generate recombinant GST-tagged BAL1 and FLAG-tagged PARP1 proteins are included in Tables S1 and S3. Using pFLAG-CMV2-BAL1 as template (2), BAL1 was PCR-amplified with primers containing Sal I and Not I restriction sites (Table S3). The Sal I- and Not I-digested BAL1 PCR product was then ligated into the vector, pGEX-4T-2 (GE Healthcare Bio-Sciences Corp., Piscataway, NJ), to generate pGEX-BAL1. Using pGEX-BAL1 as template, the double mutation BAL1 construct (DM) was generated by introducing the IE326,327AA (IE-AA) and D126A mutations into the pGEX-BAL1 vector with the indicated oligonucleotides (Table S1) and the QuikChange Site-Directed Mutagenesis Kit (Agilent Technologies). The pGEX-BAL1 recombinant proteins were generated and purified as previously described (1). Purified BAL1 and PARP1 recombinant proteins were subjected to NuPAGE and analyzed by Coomassie Blue staining.

Human PARP1 cDNA was purchased from OriGene Technologies (#SC119157). Using the PARP1 cDNA as a template, FLAG-tagged PARP1 was PCR-amplified with the indicated primers in Table S3. The resulting PCR product was ligated into pET101 following the manufacturer's instructions (Invitrogen). FLAG-PARP1 was purified using the FLAG immunoprecipitation kit according to the manufacturer's instructions (Sigma). Purified PARP1 recombinant proteins were size-fractionated and analyzed by Coomassie Blue staining.

**Subcellular localization of GFP-proteins.** Following transient transfection with GFP-BAL1 constructs (Fig. S1), 293T cells were subjected to subcellular fractionation (Nuclear Extraction kit; Active Motif). Nuclear and cytoplasmic fractions were size-fractionated on NuPage gels (Invitrogen) and immunoblotted with anti-GFP (#G10362, Invitrogen), and antibodies directed against nuclear (lamin B) and cytoplasmic ( $\beta$ -tubulin) proteins,

32 anti-Lamin B (#20682, Santa Cruz Biotechnology) and anti- $\beta$ -tubulin  
33 (#5274, Santa Cruz Biotechnology).

34 **BAL2 and BAL3 analyses.** U2OS cells were grown on coverslips, subjected  
35 to laser microirradiation and analyzed for BAL2 and BAL3 recruitment by indirect  
36 immunofluorescence with anti-BAL2 (#ab101010, Abcam) and anti-BAL3  
37 (#H00165631-B01, Abnova) antibodies. U2OS whole-cell lysates were also size-  
38 fractionated and immunoblotted for BAL2 and BAL3 using these antibodies.

39 ***In vitro* PARP activity assays.** *In vitro* poly(ADP-ribose) activity assays were  
40 carried out as previously described with minor modifications (1). Reactions  
41 including  $\approx$  200 ng of FLAG-tagged PARP1 and 0, 0.5 or 1mM of NAD<sup>+</sup> (Roche  
42 Applied Science, Indianapolis, IN) substrate were incubated at 25 °C for 30 min  
43 in assay buffer (0.1 ml) containing 50 mM Tris-HCl, pH 8.0, 4mM MgCl<sub>2</sub>, 0.2mM  
44 dithiothreitol, 200 ng of activated DNA (Sigma). In certain assays, the PARP  
45 inhibitor, PJ-34 (Sigma), was included at 1 mM final concentration. Reactions  
46 were stopped by the addition of 20% trichloroacetic acid. Precipitated proteins  
47 were rinsed once in 5% trichloroacetic acid, suspended in SDS loading buffer,  
48 and fractionated by NuPAGE (Invitrogen). After size fractionation, the proteins  
49 were subjected to immunoblotting with anti-PARP1 antibody (mouse monoclonal  
50 antibody, BD Biosciences, #51-6639); and anti-PAR (Trevigen, #4335).

51 **GST-pulldown.** For GST-pulldown in Figure S3F and G, GST-BAL1 or –  
52 BAL1 mutant protein (1  $\mu$ g) was immobilized on glutathione-Sepharose 4B beads  
53 and incubated with PARP assay samples (above) with or without NAD<sup>+</sup> in 1 ml of  
54 TBST buffer (20 mM Tris [pH 7.0], 200 mM NaCl, 1% NP-40, 1 mM dithiothreitol  
55 [DTT], and 0.5 mM EDTA) for 5 min at 4°C on a rotating wheel. After 5 washes  
56 with TBST buffer, the samples were size-fractionated and immunoblotted with  
57 anti-PARP1 (BD Biosciences) and anti-PAR (Trevigen) antibodies.

58 ***In vitro* Ubiquitylation assay.** For vector construction, the previously  
59 described human BBAP cDNA was utilized (3). Using the BBAP cDNA as a  
60 template, BBAP was PCR-amplified with the indicated primers in Table S3. The  
61 resulting PCR product was ligated into pET101 following the manufacturer's  
62 instructions (Invitrogen). His6-tagged BBAP was purified using the Ni-NTA Spin

63 Kit (Qiagen) according to the manufacturer's instructions. Purified BBAP-his6  
64 recombinant protein was size-fractionated, analyzed by Coomassie Blue staining  
65 and utilized in the *in vitro* ubiquitylation assay which was performed as previously  
66 described (3). Using recombinant pET-BBAP-his6 wild type with minor  
67 modifications to the method, wild type ubiquitin, lysine 48 (K48)-only ubiquitin  
68 and lysine 63 (K63)-only ubiquitin were purchased from Boston Biochem  
69 (Cambridge, MA 02139). For immunoblotting of specific ubiquitin-chain, anti-  
70 ubiquitin-K48 rabbit monoclonal antibody (05-1307) and anti-ubiquitin-K63 rabbit  
71 monoclonal antibody (05-1308) were purchased from Millipore.

72

73

### SUPPLEMENTAL REFERENCES

74

- 75 **1. Aguiar, R. C. T., K. Takeyama, C. He, K. Kreinbrink, and M. Shipp.** 2005.  
76 B-aggressive lymphoma (BAL) family proteins have unique domains which  
77 modulate transcription and exhibit PARP activity. *J Biol Chem* **280**:33756-  
78 33765.
- 79 **2. Takeyama, K., R. C. T. Aguiar, L. Gu, C. He, G. J. Freeman, J. L. Kutok,**  
80 **J. C. Aster, and M. A. Shipp.** 2003. The BAL-binding protein, BBAP, and  
81 related Deltex family members exhibit E3 ubiquitin ligase activity. *J Biol*  
82 *Chem* **278**:21930-21937.
- 83 **3. Yan, Q., S. Dutt, R. Xu, K. Graves, P. Juszczynski, J. P. Manis, and M.**  
84 **A. Shipp.** 2009. BBAP monoubiquitylates histone H4 at lysine 91 and  
85 selectively modulates the DNA damage response. *Mol Cell* **36**:110-120.

## SUPPLEMENTAL FIGURES

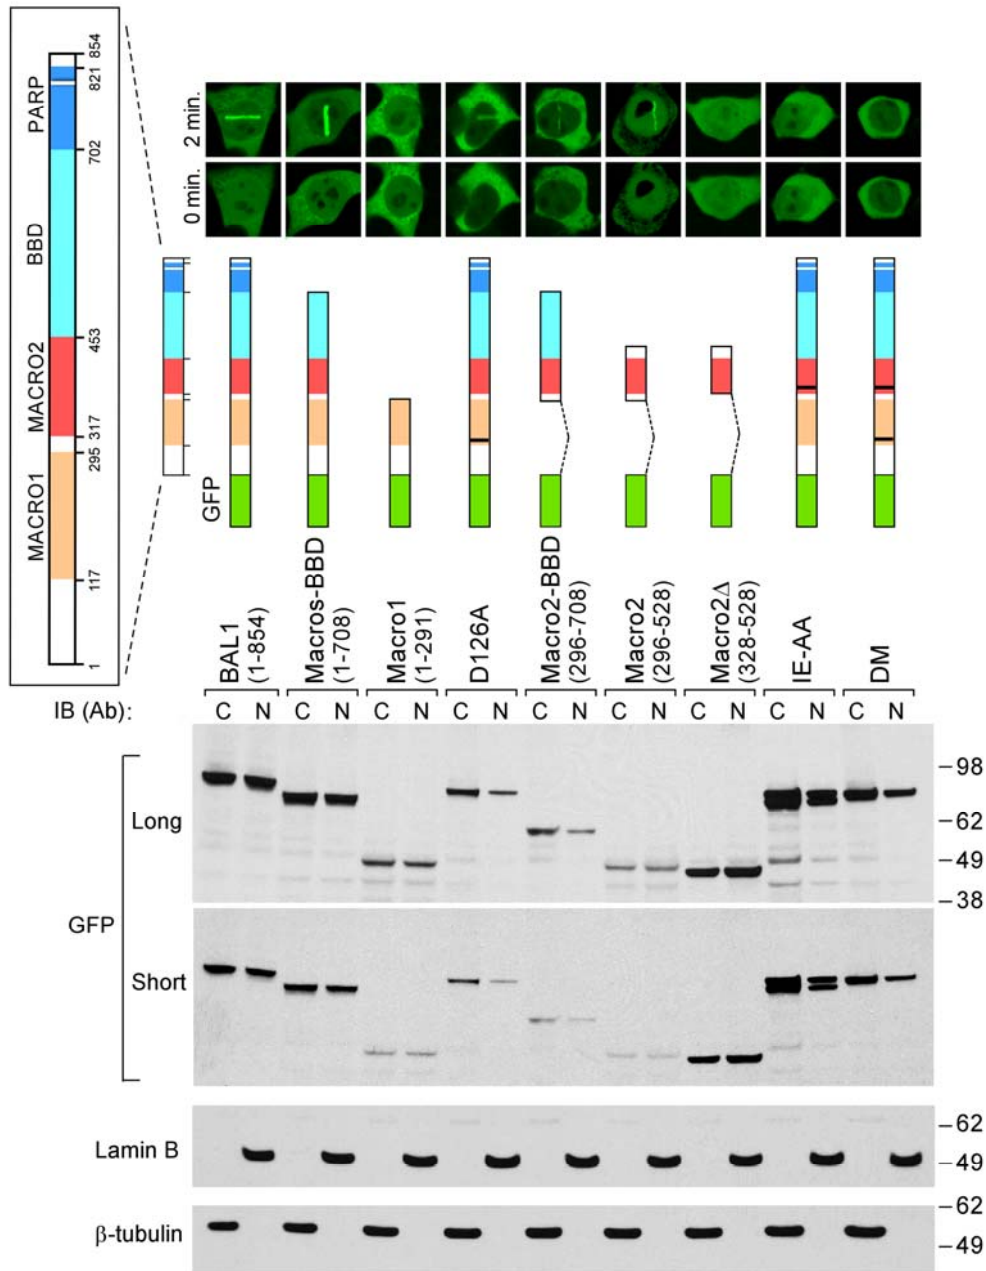87  
88

89 FIG. S1 Subcellular localization of GFP BAL1 domain-specific proteins. Top panel) Recruitment  
 90 of BAL1 domain-specific proteins to DNA damage sites. BAL1 protein functional domains,  
 91 including macro domains 1 and 2 (orange and red), BBAP binding domain (BBD, light blue in  
 92 BAL1 [2]) and region with partial sequence homology to PARP catalytic domain (dark blue)  
 93 (domain sizes and aa below). GFP-BAL1 constructs are labeled and represented below, left.  
 94 Mutations in macro domain 1 (D126A) and macro domain 2 (IE 326, 327 AA [IE-AA]) in black.  
 95 Representative images of GFP-BAL1 (293T cell) transfectants at baseline and 2 min following  
 96 laser microirradiation, right. Assays were performed as in Figure 2, main manuscript. 293T cells  
 97 were transfected with GFP-tagged BAL1 constructs for 24 hours. Bottom panel) Subcellular  
 98 localization of GFP-tagged BAL1 domain-specific proteins. Cytosolic (C) and nuclear (N) fractions  
 99 were obtained, size fractionated, and analyzed by immunoblotting with anti-GFP, anti-lamin B  
 100 (nuclear protein control), and anti-β-tubulin (cytoplasmic protein control).

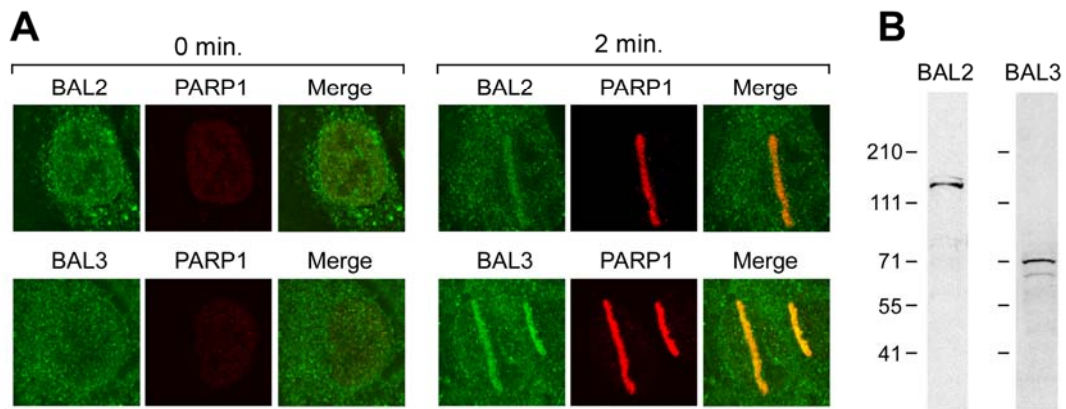

101

102

103 FIG. S2 BAL2 and BAL3 are recruited to DNA damage sites. A) Co-localization of PARP1 and  
 104 BAL2 (top panel) or PARP1 and BAL3 (bottom panel) at laser-induced DNA breaks in U2OS  
 105 cells. Images obtained at baseline and 2 min following laser-microirradiation. Endogenous BAL2  
 106 or BAL3 (FITC); PARP1 (cy5); and merged images. B) Confirmation of the specificity of the anti-  
 107 BAL2 and BAL3 antibodies. U2OS whole-cell lysates were obtained, size-fractionated and  
 108 analyzed by immunoblotting with anti- BAL2 (#ab101010, Abcam) and anti-BAL3 (#H00165631-  
 109 B01, Abnova) antibodies to confirm specificity. MWM, right.

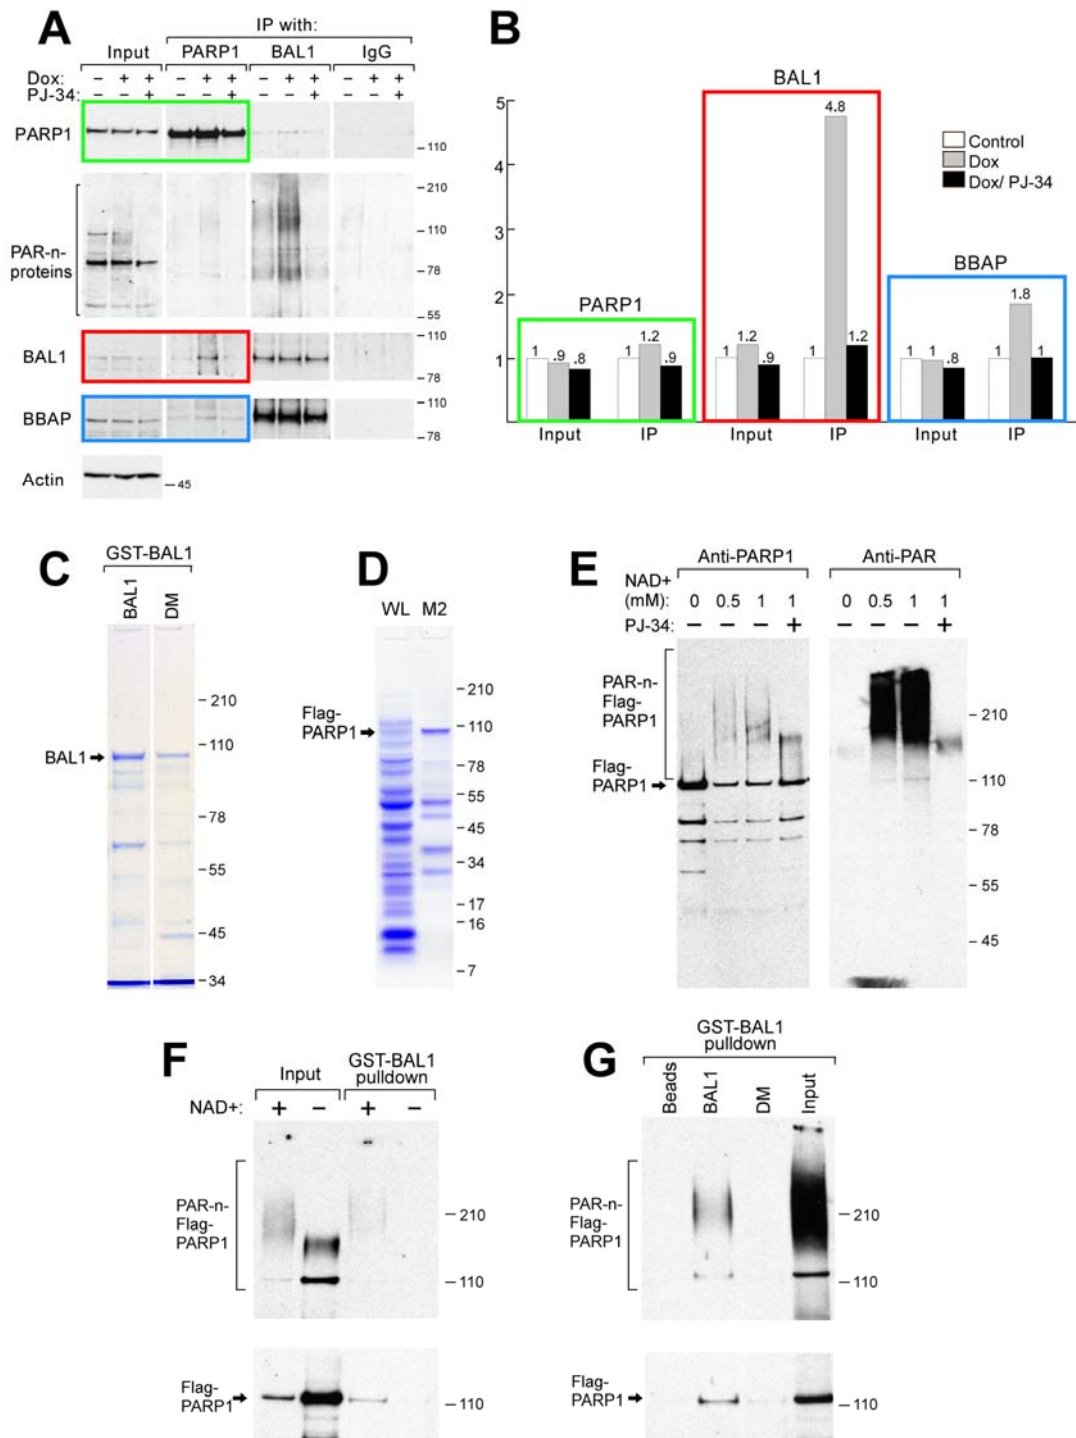

110

111 FIG. S3 Analyses of co-immunoprecipitated PARP1, BAL1 and BBAP and the interaction  
 112 between GST-BAL1 and PAR. A) Co-immunoprecipitation of PAR-n- protein and BAL1 (Fig. 3D  
 113 from main manuscript). Hela cells were untreated or treated with low-dose Dox (50 ng/ml) for 10  
 114 min with or without PJ-34 pretreatment. Cell lysates were immunoprecipitated (IP) with anti-  
 115 PARP1, anti-BAL1 or control IgG and immunoblotted with anti-PARP1, -PAR, -BAL1 or -BBAP  
 116 antibodies. Input whole cell lysates (left panel) were similarly analyzed and immunoblotted for  
 117 actin as a loading control. Molecular weight markers, right. B) Scanning densitometric analysis of  
 118 PARP1 immunoprecipitates in untreated cells and cells treated with Dox alone or Dox following  
 119 PJ-34 pretreatment. PARP1, green box. BAL1 co-immunoprecipitated with PARP1, red box.

120 BBAP, blue box. There was only a modest increase in PARP1 immunoprecipitated following Dox  
121 treatment (1X control, 1.2X Dox-treated cells). In contrast, there was a 4.8 fold increase in BAL1  
122 and a 1.8 X increase in BBAP co-immunoprecipitated with PARP1 in Dox-treated cells. Of  
123 importance, chemical PARP inhibition (PJ-34 pretreatment) decreased the co-  
124 immunoprecipitation of BAL1 and BBAP with PARP1 in Dox-treated cells. C) Recombinant GST-  
125 BAL1 proteins (BAL1 full length and DM [IE-AA and D126A] mutants [see schema, Fig. 1F, main  
126 manuscript]). Proteins were synthesized, size-fractionated by NuPAGE and analyzed by  
127 Coomassie Blue staining. D) FLAG-PARP1. FLAG-PARP1 (M2) was purified from whole cell  
128 lysate (WL), size-fractionated by NuPAGE and analyzed by Coomassie Blue staining. E)  
129 Immunoblotting of PAR-n-proteins following PARP1 activation *in vitro*. *In vitro* assays included  $\approx$   
130 200ng purified FLAG- PARP1 and 0, 0.5 or 1mM NAD<sup>+</sup>. Assays were performed in the presence  
131 (+) or absence (-) of the PARP inhibitor, PJ-34. Thereafter, samples were size-fractionated and  
132 immunoblotted with anti-PARP1 and anti-PAR antibodies. FLAG-PARP1 was ADP-ribosylated in  
133 a dose-dependent manner by NAD<sup>+</sup>; this enzymatic activity was inhibited by PJ-34, confirming its  
134 specificity. F) Pulldown of PAR-n-FLAG-PARP1 by GST-BAL1. GST-BAL1 (1ug) was immobilized  
135 on glutathione-sepharose 4B beads and incubated with products of *in vitro* PARP1 activation (+  
136 or - NAD<sup>+</sup>, as in E). After multiple washes, GST-BAL1 bound proteins were size-fractionated and  
137 immunoblotted with anti-PAR and anti-PARP1 antibodies (upper and lower panels, respectively).  
138 The products of the *in vitro* PARP1 assay (Input, + or - NAD<sup>+</sup>) were similarly analyzed. GST-  
139 BAL1 selectively pulled down PAR-modified PARP1 but did not bind unmodified PARP1 protein.  
140 G) Pulldown of PAR-n-FLAG-PARP1 by GST-BAL1 mutants. Assays including GST-BAL1, or -  
141 BAL1 DM were performed as in (F). GST-BAL1 pulled down PAR-modified PARP1 in a macro  
142 domain-dependent manner.

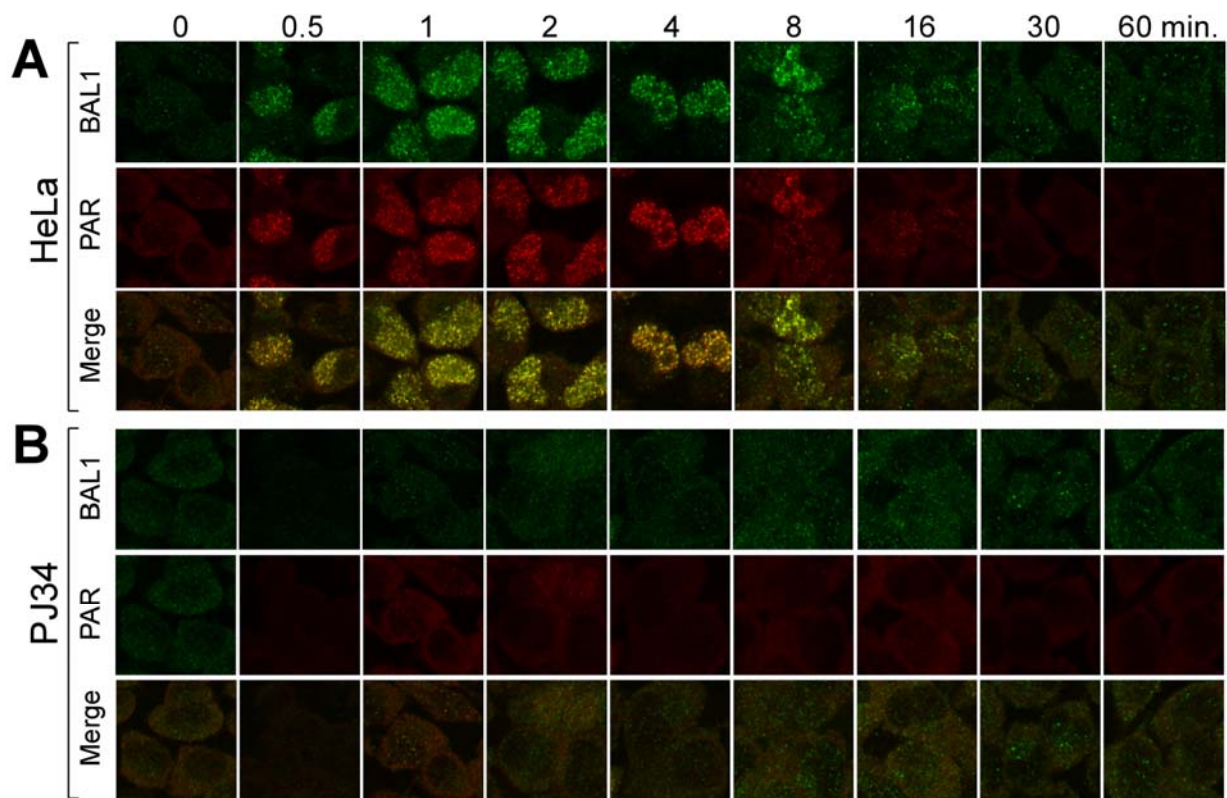

143

144

145 FIG. S4 Co-localization of BAL1 and PAR foci in  $\gamma$ -irradiated control HeLa cells (A), and HeLa cells  
 146 pretreated with PJ-34 (B). HeLa cells were treated with low-dose irradiation (100cGy) and  
 147 analyzed for BAL1 and PAR foci at baseline and at serial timepoints (0.5 – 60 min) thereafter.  
 148 BAL1, top; PAR, middle; merged images, bottom.



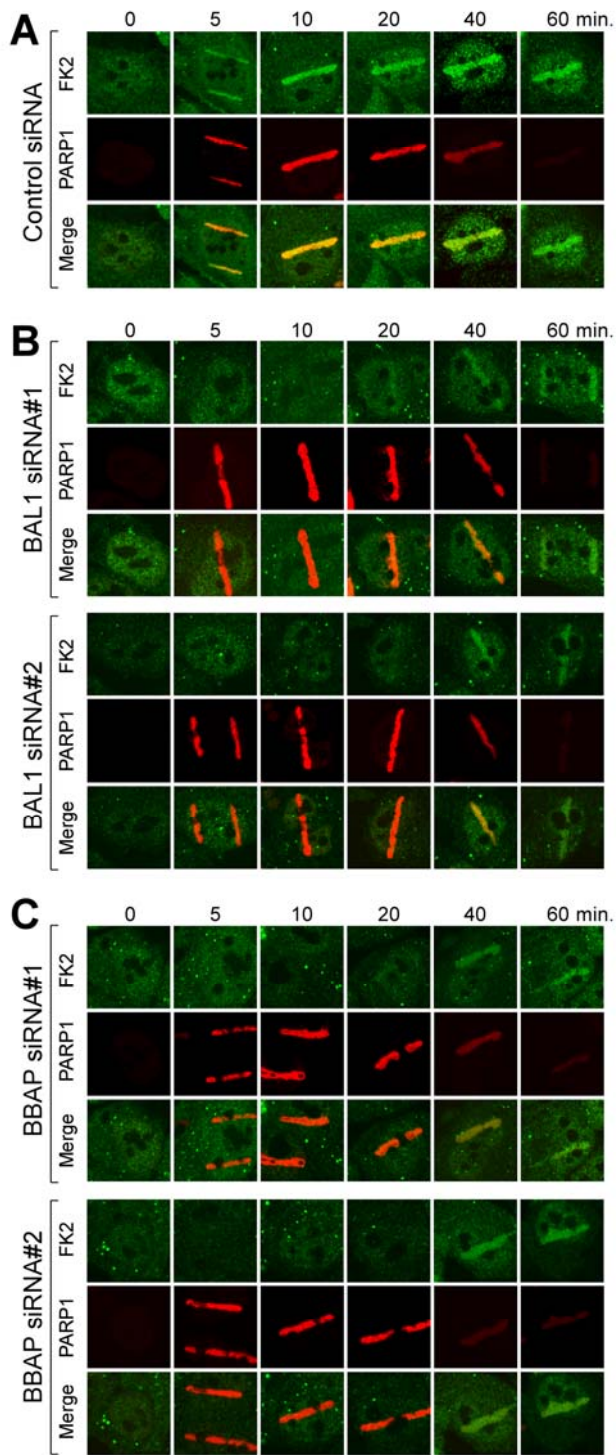

149

150 FIG. S5 PARP-dependent recruitment of BAL1 and BBAP to DNA damage sites is required for  
 151 early ubiquitin chain formation. Ubiquitylation (conjugated ubiquitin, FK2 immunostaining) and  
 152 PARP1 recruitment in laser-microirradiated control cells (A) or cells depleted of BAL with 2  
 153 independent siRNAs (B) or cells depleted of BBAP with 2 independent siRNAs (C) at serial  
 154 timepoints (0 – 60 min) following DNA damage.

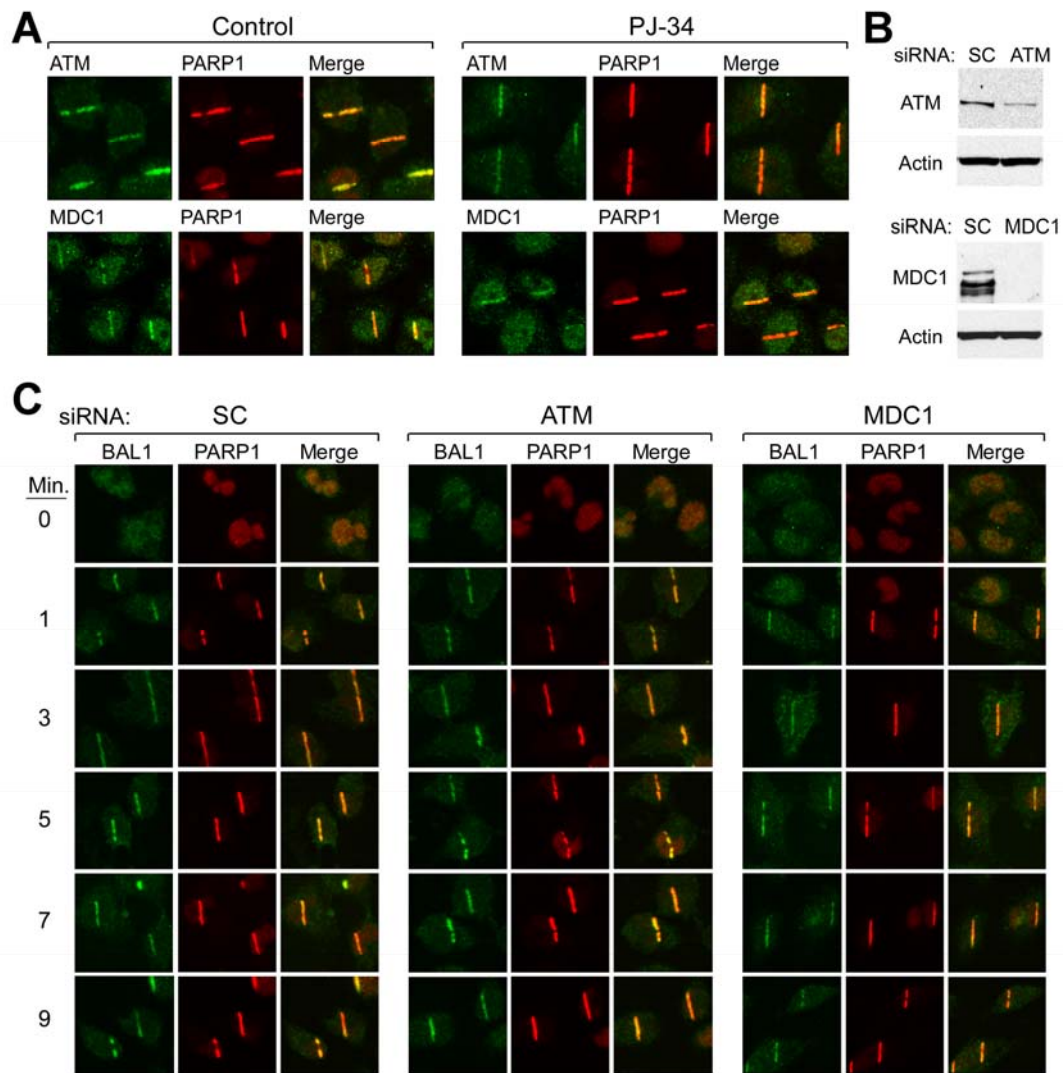

155

156

157 FIG. S6 PARP1 activation and BAL1/BBAP recruitment to DNA damage sites are independent of  
 158 ATM and MDC1. A) Recruitment of PARP1, ATM and MDC1 to laser-induced breaks in control  
 159 or PJ-34 pretreated cells (5 min following laser microirradiation). B) Depletion of ATM or MDC1  
 160 following siRNA. HeLa cells treated with a scrambled control (SC) or ATM or MDC1 siRNA were  
 161 lysed, size-fractionated and immunoblotted with the respective antibodies and actin (as a loading  
 162 control). C) Recruitment of BAL1 and PARP1 to laser-induced breaks in control cells or cells  
 163 depleted of ATM or MDC1. Assays were performed and analyzed at serial timepoints following  
 164 laser microirradiation (baseline [0] and 1-9 min).

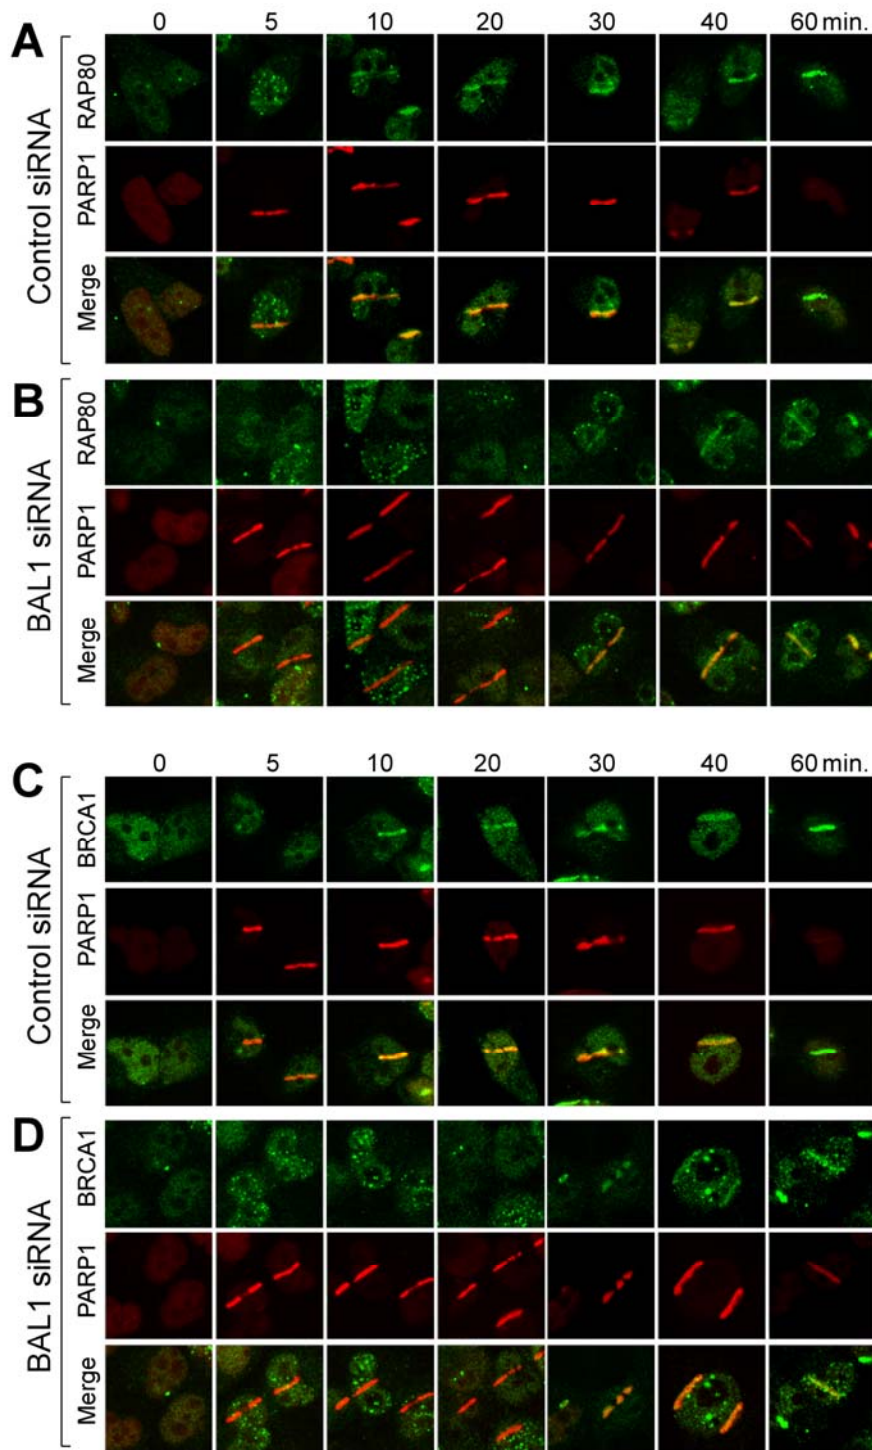

165

166 FIG. S7 Kinetics of recruitment of RAP80/BRCA1 and PARP1 to laser-induced breaks. (A, B)  
 167 RAP80 or (C, D) BRCA1 and PARP1 localization in laser-induced breaks in control cells (A and  
 168 C) or cells depleted of BAL1 (via siRNA) (B and D). Assays were performed as in Figure 8, main  
 169 manuscript, and analyzed at serial timepoints following laser microirradiation (baseline [0] and 5-  
 170 60 min).

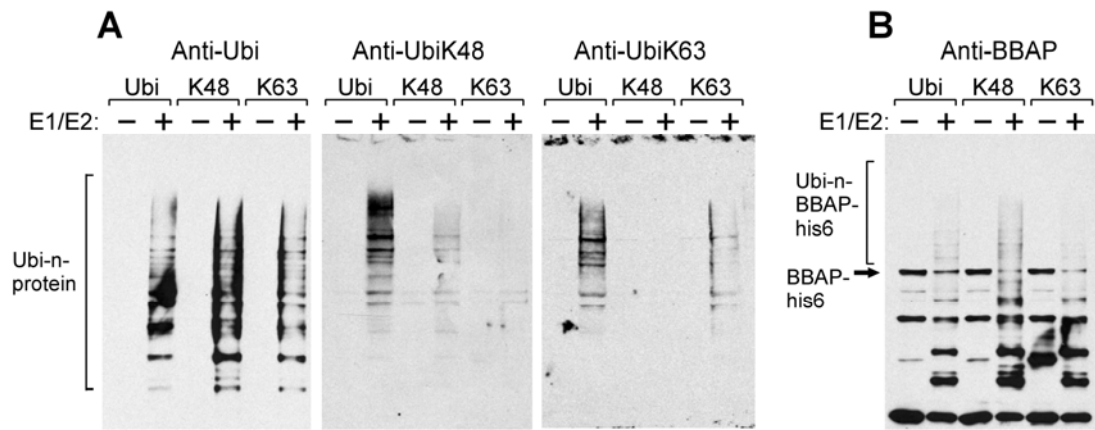

171

172

173

174

175

176

177

FIG. S8 *In vitro* analysis of BBAP ubiquitylation using lysine- specific ubiquitin. BBAP-his6 was purified from *E. coli.* and was incubated with or without E1/E2 ligase and wild-type ubiquitin, K48-only ubiquitin, or K63-only ubiquitin. Thereafter, samples were size-fractionated and immunoblotted with the following antibodies: anti-ubiquitin, anti-ubiK48, anti-ubiK63 (A) and anti-BBAP (B).

178 **Table S1: Oligonucleotides and primers used to generate GFP-BAL1,**  
 179 **GFP-BBAP and GFP-PARP1 constructs.**

| Vector name | Pair of Oligos or primers                   | Location*<br>(bp) | Wild type (bp)                   |
|-------------|---------------------------------------------|-------------------|----------------------------------|
| GFP-BAL1    | 5'_atggactttccatggtggccggag_3'              | 104-128           |                                  |
|             | 5'_ttaatcaacagggtgccactg_3'                 | 2563-2541         |                                  |
| Macros-BBD  | 5'_gttcagcaagtcccataAcagtctgcaatgtggt_3'    | 2336-2471         | C nt2454                         |
|             | 5'_accacattgcagaactgTtatgggactgctgaaac_3'   | 2471-2336         | G                                |
| Macro1      | 5'_gggaagagtgagctgggacaaTaaaccacccttcttc_3' | 1216-1255         | C nt1202                         |
|             | 5'_gaaagaagggtggtttattgtccagctcactcttccc_3' | 1255-1216         | G                                |
| Marco2-BBD  | 5'_ctaggggaagagtgagctgggacaagaaacc_3'       | 1213-1242         |                                  |
|             | 5'_accacattgcagaactgttatgggactgctgaaac_3'   | 2471-2336         | G nt2454                         |
| Marco2      | 5'_ctaggggaagagtgagctgggacaagaaacc_3'       | 1213-1242         |                                  |
|             | 5'_ggatccatgcgtgggctAttacatctctccacgtg_3'   | 1930-1893         | C nt1913                         |
| Macro2Δ     | 5'_tggcagacggcagatgtaattgt_3'               | 1309-1332         |                                  |
|             | 5'_ggatccatgcgtgggctAttacatctctccacgtg_3'   | 1930-1893         | C nt1913                         |
| D126A       | 5'_cagtctgaaagatgCctcaccacacatgctg_3'       | 689-721           | A nt704                          |
|             | 5'_cagcatgtgtggtgaggGcatcttccagactg_3'      | 721-689           | T                                |
| IE326,327AA | 5'_gtccagggccacGCtgCatggcagacggcagatg_3'    | 1291-1324         | AT<br>nt1303,nt1304,<br>A nt1307 |
|             | 5'_catctgccgtctgcatGcaGCgtggccctggac_3'     | 1324-1291         | T, TA                            |
| GFP-BBAP    | 5'_atggcctcccacctgccccccgctc_3'             | 90-115            |                                  |
|             | 5'_ttactcaattccttggcttcagctc_3'             | 2312-2285         |                                  |
| GFP-PARP1   | 5'_atggcggagtcttcggataagctc_3'              | 172-295           |                                  |
|             | 5'_ttaccacagggaggtcttaaaattg_3'             | 3216-3192         |                                  |

180 Mutated bases in the oligonucleotides are capitalized and their positions  
 181 indicated (right column).

182 \* NCBI reference access number: BAL1, NM\_031458.2; BBAP, NM\_138287.3;  
 183 PARP1, NM\_001618.3.

184

185 **Table S2: BAL1, PARP1, ATM, MDC1 and RNF8 siRNAs**

| Gene*             | RNA sequences                     | Location (bp)   | 3' DNA overhanging |
|-------------------|-----------------------------------|-----------------|--------------------|
| BAL1<br>siRNA#1   | 5'_GCCACGCAUGGAUCCAAAGAAU_3'      | 1915-1937       | CC                 |
|                   | 5'_GGAUUCUUUGGAUCCAUGCGUGGGCCU_3' | 1939-1913       |                    |
| BAL1<br>siRNA#2   | 5'_CCCAUACCAGUUCUGCAAUGUGG_3'     | 2448-2470       | TA                 |
|                   | 5'_UACCACAUUGCAGAACUGGUAUGGGAC_3' | 2472-2446       |                    |
| BAL1<br>siRNA#3** | 5'_GGAAGUAGCUCUCCAGCUUCCUU_3'     | 160-184         | CG                 |
|                   | 5'_CGAAGGAAGCUGGAGAGCUACUCCAG_3'  | 186-158         |                    |
| PARP1<br>siRNA    | 5'_CCAAAGGAAGGAACGCUAACAAU_3'     | 3758-3780       | TT                 |
|                   | 5'_AAAUUGUUAGCGUUCUCCUUGGUC_3'    | 3782-3756       |                    |
| ATM<br>siRNA      | 5'_AGCUAUCAGAGAAGCUAAUAAAU_3'     | 12710-<br>12732 | TA                 |
|                   | 5'_UAAUUUAAUAGCUUCUCUGAUAGCUUC_3' | 12734-<br>12708 |                    |
| MDC1<br>siRNA     | 5'_CCACUAGGAGAAAGACAAAUAGG_3'     | 5350-5372       | TC                 |
|                   | 5'_GACCUAUUUGUCUUUCUCCUAGUGGCC_3' | 5374-5348       |                    |
| RNF8<br>siRNA     | 5'_CCCUUGUACAUUAUCUUUAGAG_3'      | 3662-3684       | AG                 |
|                   | 5'_CUCUCUAAAGAUUAUGUACAAGGGUG_3'  | 3686-3660       |                    |

186 \* NCBI reference access number: BAL1, NM\_031458.2; PARP1, NM\_001618.3;

187 ATM, N000051.3; MDC1, NM\_014641.2; RNF8, NM\_003958

188 \*\* 5'-UTR specific BAL1 siRNA

189

190 **Table S3: Oligonucleotides and primers used to generate recombinant**  
 191 **BAL1 and PARP1 proteins in E. coli.**

| Vector name  | Pair of Oligos or primers                                         | Location (bp) |
|--------------|-------------------------------------------------------------------|---------------|
| BBAP-his6    | 5'_cacatggcctcccacctgcgcccgcctc_3'                                | 90-115        |
|              | 5'_ctcaattccttggcttcagctc_3'                                      | 2312-2285     |
| GST-BAL1*    | 5'_accgGTCGACatggactttccatggtggccggag_3'                          | 104-128       |
|              | 5'_caccGCGGCCGCTtaatcaacagggtgccactg_3'                           | 2563-2541     |
| FLAG-PARP1** | 5'_caccATGGACTACAAGGATGACGATGACAAGatggcggagtcttcggataag<br>ctc_3' | 172-295       |
|              | 5'_taccacaggagggtcttaaattg_3'                                     | 3216-3192     |

192

193 \* The RE sites are capitalized.

194 \*\* The DNA sequence encoding FLAG tag is capitalized.

195
